# Supplementary material for: Blockade of Rho-associated protein kinase (ROCK) inhibits the contractility and invasion potential of cancer stem like cells
Source: PubMed Central journal article supplement (PMC5400594; doi:10.18632/oncotarget.15248), 2017-02-10
Supplement: oncotarget-08-21418-s001.pdf [file oncotarget-08-21418-s001.pdf]

## Blockade of Rho-associated protein kinase (ROCK) inhibits the contractility and invasion potential of cancer stem like cells

### SUPPLEMENTARY FIGURE

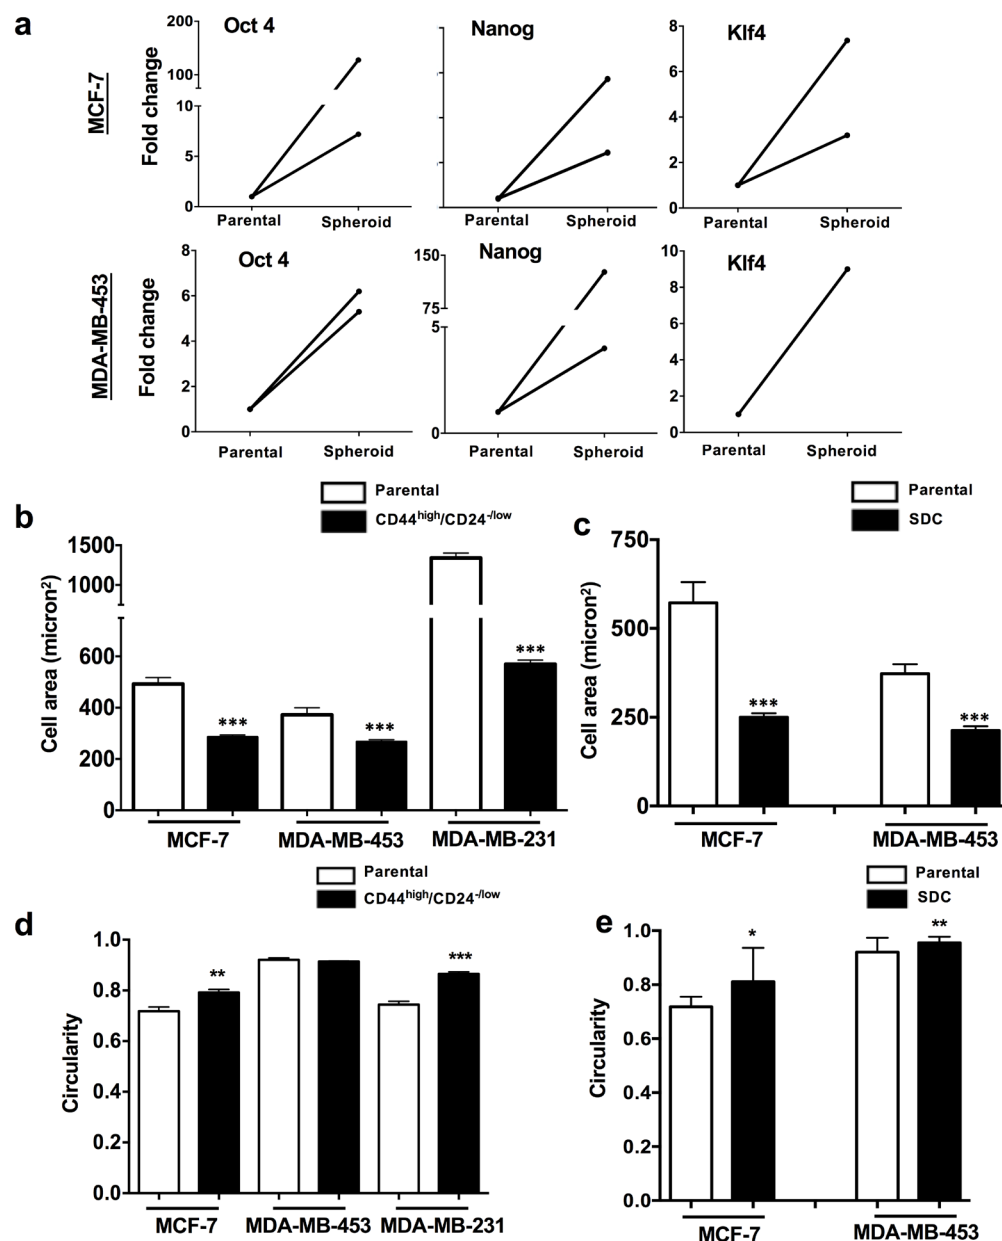

**Supplementary Figure 1:** **a.** Spheroids show increased expression of stemness markers (mRNA levels) such as Oct4, Nanog and Klf4 when compared to the control (parental population) as determined by Real time RT-PCR. **b-c.** Quantification of cell area of CSCs (CD44<sup>high</sup>/CD24<sup>-low</sup> cells and SDCs) compared with control cells (parental) from all three cell lines. All three cell lines (MCF-7, MDA-MB-231, and MDA-MB-453) showed significant decrease in cell area in both CD44<sup>high</sup>/CD24<sup>-low</sup> and SDC when compared to the parental cells. (\*\*\*,  $p < 0.05$ ) ( $n=3$ ). **d-e.** Circularity of CSCs enriched using both methods (FACS sorted and spheroids) from three different cell lines (MCF-7, MDA-MB-231, and MDA-MB-453) was found to be significantly higher when compared to the parental population. (\*,  $p$  value  $< 0.05$ ) (\*\*,  $p$  value  $< 0.001$ ) (\*\*\*,  $p$  value  $< 0.0001$ ) ( $n=3$ ).
